# Supplementary material
Source: PubMed Central journal article supplement (PMC3874936)
Supplement: NIHMS512446-supplement-3.pdf [file NIHMS512446-supplement-3.pdf]

**Supplementary Table 3a: Variants previously reported to alter splicing of the CFTR gene as established by functional studies.**

| HGVS nucleotide nomenclature name | Legacy name   | Quantity of normal CFTR mRNA (% of WT) | RNA source         | Reference |
|-----------------------------------|---------------|----------------------------------------|--------------------|-----------|
| c.1679+1.6kbA>G                   | 1811+1.6kbA>G | 1-3                                    | Nasal epithelium   | 17, 18    |
| c.1766+3A>G                       | 1898+3A>G     | 0                                      | Minigene construct | 18        |
| c.2657+5G>A                       | 2789+5G>A     | 4                                      | Nasal epithelium   | 19        |
| c.3140-26A>G                      | 3272-26A>G    | 5                                      | Nasal epithelium   | 20, 21    |
| c.3717+12191C>T                   | 3849+10kbC>T  | 8                                      | Nasal epithelium   | 8         |

**Supplementary Table 3b: Comparison of CFTR RNA splicing variants studied *in vitro* by minigene with *in vivo* results.**

| HGVS nucleotide nomenclature name | Legacy name | CFTR Minigene analysis                      |                   | CFTR <i>in vivo</i> analysis                | Reference |
|-----------------------------------|-------------|---------------------------------------------|-------------------|---------------------------------------------|-----------|
|                                   |             | Transcript                                  | Protein (band C)  | Transcript                                  |           |
| c.579+1G>T                        | 711+1G>T    | Exon 5 skipping                             | Not detected      | Exon 5 skipping                             | 23, 24    |
| c.1585-1G>A                       | 1717-1G>A   | (i) Exon 11 skipping<br>(ii) c.1717delG     | Not detected      | Exon 11 skipping                            | 25        |
| c.2657+5G>A                       | 2789+5G>A   | (i) WT transcript<br>(ii) Exon 14b skipping | <10% of wild type | (i) WT transcript<br>(ii) Exon 14b skipping | 19        |

**Supplementary Table 3c: Relative amount of properly spliced RNA transcript and fully processed protein generated by CFTR minigenes transfected into two human cell lines.**

| HGVS nucleotide nomenclature name | Legacy name | Correctly spliced CFTR transcript (% of respective WT minigene $\pm$ S.D.) |              | Processed CFTR protein C-band (% of respective WT minigene $\pm$ S.D.) |              |
|-----------------------------------|-------------|----------------------------------------------------------------------------|--------------|------------------------------------------------------------------------|--------------|
|                                   |             | HEK                                                                        | CFBE41o-     | HEK                                                                    | CFBE41o-     |
| c.579+3A>G                        | 711+3A>G    | 0                                                                          | ND           | 0                                                                      | ND           |
| c.579+5G>A                        | 711+5G>A    | 0                                                                          | ND           | 0                                                                      | ND           |
| c.1585-8G>A                       | 1717-8G>A   | 0                                                                          | 0            | 0                                                                      | 0            |
| c.2657+2_2657+3insA               | 2789+2insA  | 71 $\pm$ 7.3                                                               | 80 $\pm$ 8.3 | 76 $\pm$ 10.7                                                          | 84 $\pm$ 6.3 |
| c.2988G>A                         | 3120G>A     | 0                                                                          | 0            | 0                                                                      | 0            |

ND indicates not done.
